# Supplementary material for: Sleep problems and referral intentions in mental health services: service user self-report and staff proxy report surveys
Source: BMC Psychiatry. 2023 Aug 10;23:583. doi: 10.1186/s12888-023-04817-6 (PMC10413589; doi:10.1186/s12888-023-04817-6)
Supplement: Supplementary file 2 — Appendix 2: Summary demographic data from Business Intelligence at NHS Trust #1 [file 12888_2023_4817_MOESM2_ESM.xlsx]

## Sheet: Sheet1
Summary demographic data for clients open to Trust #1 on 10/11/2021				Service user survey participants				Service users via staff proxy (staff survey)
Measure	Total	%			Total	%			Total	%
Total number of clients	46058				190				619
Primary diagnosis for clients with a diagnosis recorded				Primary diagnosis for those clients reporting a diagnosis:				Primary diagnosis
Primary Diagnosis: Schizophrenia	3627	0.185981		schizophrenia	83	0.50303		schizophrenia spectrum disorder	199	0.322
Primary Diagnosis: Schizoaffective disorder	756	0.0387653		schizoaffective disorder	10	0.0606061
Primary Diagnosis: Other psychosis diagnosis	1340	0.0687109		other psychosis diagnosis	16	0.0848485		psychosis not otherwise specified	74	0.12
Primary Diagnosis: Bipolar affective disorder	1313	0.0673264		bipolar affective disorder	14	0.133333		bipolar affective disorder	53	0.086
Primary Diagnosis: Depression / anxiety	2719	0.139422		depression / anxiety	22	0.0969697		depression / anxiety	102	0.165
Primary Diagnosis: Personality disorder	1287	0.0659932		personality disorder	13	0.0787879		personality disorder	77	0.124
Primary Diagnosis: Other Diagnosis recorded	8460	0.433802		other, none of the above	7	0.0424242		substance misuse disorder	56	0.091
total clients with a diagnosis recorded	19502			total clients reporting a diagnosis	165			none of the above	58	0.094
Primary Diagnosis: No diagnosis recorded	26556			I don't have a diagnosis	10
				I don't know / can't remember	6
				no response	9
Ethnicity				Ethnicity:*
Ethnicity: White British	28685	0.622802		White British	140	0.773
Ethnicity: White Other	2086	0.0452907		Other white	4	0.022
Ethnicity: Asian or Asian British	2916	0.0633115		Asian	10	0.063
Ethnicity: Black or Black British	1816	0.0394285		Black/African/Caribbean	5	0.028
Ethnicity: Mixed	1910	0.0414695		Mixed	13	0.072
Ethnicity: Other Ethnic Group	1291	0.0280299		Any other ethnic group	3	0.017
Ethnicity: Not stated / not disclosed	2726	0.0591862		I prefer not to say	6	0.033
Ethnicity: Unknown	4628	0.100482
Gender				Gender:
Gender: Female	26766	0.581137		female	89	0.489
Gender: Male	19046	0.413522		male	86	0.472
Gender: Not specified	98	0.00212775		other*	5	0.028
Gender: Not known	148	0.00321334		I prefer not to say	2	0.011
Age bracket				Age
Age bracket: 18 to 24	6915	0.150137		18-24	11	0.06
Age bracket: 25 to 30	6763	0.146837		25-30	19	0.104
Age bracket: 31 to 40	9793	0.212623		31-40	39	0.214
Age bracket: 41 to 50	6791	0.147445		41-50	52	0.286
Age bracket: 51 to 60	6116	0.132789		51-60	42	0.231
Age bracket: 61 to 70	3409	0.0740154		61-70	16	0.088
Age bracket: 71+	6271	0.136154		71+	3	0.017
